# Supplementary material for: Green assessment of polymer microparticles production processes: a critical review
Source: Royal Society of Chemistry journal article supplement (doi:10.1039/d2gc00578f), 2022-01-01
Supplement: d2gc00578f1.pdf [file d2gc00578f1.pdf]

## Supporting Information

### Green assessment of polymer microparticles production processes: a critical review

Hassan El Itawi,\*<sup>1</sup> Sami Fadlallah,\*<sup>2</sup> Florent Allais,<sup>2</sup> Patrick Perré<sup>1</sup>

<sup>1</sup> Université Paris-Saclay, CentraleSupélec, Laboratoire de Génie des Procédés et Matériaux, SFR Condorcet FR CNRS 3417, Centre Européen de Biotechnologie et de Bioéconomie (CEBB), 3 rue des Rouges Terres, Pomacle 51110, France

<sup>2</sup> URD Agro-Biotechnologies Industrielles (ABI), CEBB, AgroParisTech, 51100, Pomacle, France.

[\\*hassan.el-itawi@centralesupelec.fr](mailto:hassan.el-itawi@centralesupelec.fr), [sami.fadlallah@agroparistech.fr](mailto:sami.fadlallah@agroparistech.fr)

#### Table of content

|                                                                                       |    |
|---------------------------------------------------------------------------------------|----|
| <b>Abbreviations</b> .....                                                            | S2 |
| <b>Sustainable Assessment of Suspension polymerization: Calculation Details</b> ..... | S3 |
| <b>Sustainable Assessment of Coacervation: : Calculation Details</b> .....            | S3 |
| <b>Sustainable Assessment of Atomization: Calculation Details</b> .....               | S3 |
| <b>Sustainable Assessment of Microfluidics: Calculation Details</b> .....             | S4 |

## Abbreviations

|                                  |                                               |
|----------------------------------|-----------------------------------------------|
| <b><math>m_m</math>:</b>         | Mass of monomer                               |
| <b><math>m_r</math>:</b>         | Mass of raw material                          |
| <b><math>m_{or}</math>:</b>      | Mass of organic solvents                      |
| <b><math>m_{aq}</math>:</b>      | Mass of aqueous solvents                      |
| <b><math>m_{SC}</math>:</b>      | Mass of super critical CO <sub>2</sub>        |
| <b><math>m_p</math>:</b>         | Mass of product                               |
| <b><math>m_{pol}</math>:</b>     | Mass of polymer solute                        |
| <b><math>m_{core}</math>:</b>    | Mass of core material before process          |
| <b><math>m_{shell}</math>:</b>   | Mass of polymer solute before process         |
| <b><math>m_{core}^*</math>:</b>  | Mass of core material after process           |
| <b><math>m_{cap}</math>:</b>     | Mass of the formed capsule                    |
| <b><math>m_{shell}^*</math>:</b> | Mass of shell material after process          |
| <b><math>m_{dr}</math>:</b>      | Mass of loaded drug                           |
| <b><math>m_d</math>:</b>         | Mass of dispersed phase                       |
| <b><math>m_c</math>:</b>         | Mass of continuous phase                      |
| <b><math>\phi</math>:</b>        | $m_d/m_c$                                     |
| <b>T:</b>                        | Process duration                              |
| <b><math>t_p</math>:</b>         | Post-processing duration                      |
| <b>T:</b>                        | Process temperature                           |
| <b><math>T_p</math>:</b>         | Post-processing temperature                   |
| <b><math>T_{air}</math>:</b>     | Air temperature                               |
| <b><math>E_{eff}</math>:</b>     | Encapsulation efficiency                      |
| <b>PL:</b>                       | Payload                                       |
| <b><math>Q_{core}</math>:</b>    | Flow rate of core material phase              |
| <b><math>Q_d</math>:</b>         | Flow rate of dispersed (shell material) phase |
| <b><math>Q_c</math>:</b>         | Flow rate of continuous phase                 |

## Sustainable Assessment of Suspension polymerization: Calculation Details

| Process | m <sub>m</sub> (g) | m <sub>r</sub> (g) | m <sub>or</sub> (g) | m <sub>aq</sub> (g) | m <sub>SC</sub> (g) | T (°C) | t (h) | φ   | Conv (%) | Yield (%) | m <sub>p</sub> (g) | sEF  | EF   | cEF  |
|---------|--------------------|--------------------|---------------------|---------------------|---------------------|--------|-------|-----|----------|-----------|--------------------|------|------|------|
| P1      | 0.4                | 0.1                | 0                   | 1                   | 0                   | 50     | 24    | 0.4 | 68       | =conv     | 0.3                | 0.7  | 0.7  | 4.3  |
| P2      | 0.8                | 0.1                | 0                   | 1                   | 0                   | 50     | 24    | 0.8 | 69       | =conv     | 0.6                | 0.6  | 0.6  | 2.3  |
| P3      | 1.1                | 0.1                | 0                   | 1                   | 0                   | 50     | 24    | 1.1 | 69.5     | =conv     | 0.8                | 0.5  | 0.5  | 1.8  |
| P4      | 75                 | 3.5                | 0                   | 225                 | 0                   | 83     | 8     | 0.3 | 72       | =conv     | 54                 | 0.5  | 0.5  | 4.6  |
| P5      | 75                 | 2.4                | 0                   | 225                 | 0                   | 83     | 1.3   | 0.3 | 82       | =conv     | 61.5               | 0.3  | 0.3  | 3.9  |
| P6      | 59                 | 3                  | 0                   | 175                 | 0                   | 87     | 5     | 0.3 | 74       | =conv     | 43.7               | 0.4  | 0.4  | 4.4  |
| P7      | 120                | 3.7                | 0                   | 180                 | 0                   | 87     | 5     | 0.7 | 93       | =conv     | 111.6              | 0.1  | 0.1  | 1.7  |
| P8      | 75                 | 2.4                | 0                   | 225                 | 0                   | 83     | 1     | 0.3 | 88       | =conv     | 66                 | 0.2  | 0.2  | 3.6  |
| P9      | 6.7                | 12.5               | 100                 | 44                  | 0                   | 55     | 1     | 0.1 | 60       | =conv     | 4                  | 3.8  | 28.9 | 39.9 |
| P10     | 6.7                | 12.5               | 100                 | 44                  | 0                   | 85     | 1     | 0.1 | 82.5     | =conv     | 5.5                | 2.5  | 20.7 | 28.7 |
| P11     | 6.7                | 12.5               | 100                 | 44                  | 0                   | 75     | 1     | 0.1 | 97.5     | =conv     | 6.5                | 2    | 17.4 | 24.2 |
| P12     | 6.7                | 12.5               | 100                 | 44                  | 0                   | 75     | 2     | 0.1 | 97.5     | =conv     | 6.5                | 2    | 17.4 | 24.2 |
| P13     | 6.7                | 12.5               | 100                 | 44                  | 0                   | 75     | 0.3   | 0.1 | 65       | =conv     | 4.3                | 3.4  | 26.6 | 36.7 |
| P14     | 207.6              | 0.4                | 0                   | 0                   | 457                 | 75     | 1.5   | 0.5 | -        | 97        | 201.4              | 0.03 | 2.3  | 2.3  |
| P15     | 203.9              | 2.1                | 0                   | 0                   | 454                 | 75     | 1.5   | 0.4 | -        | 97        | 197.8              | 0.04 | 2.3  | 2.3  |

Table 1 : Details for the calculation of the E-factors for the suspension polymerization process (section 4.1).

## Sustainable Assessment of Coacervation: Calculation Details

| Process | m <sub>core</sub> (g) | m <sub>shell</sub> (g) | m <sub>r</sub> (g) | t (h) | T (°C) | T <sub>p</sub> (°C) | m <sub>aq</sub> (g) | m <sub>or</sub> (g) | E <sub>eff</sub> (%) | PL (%) | m <sub>core</sub> <sup>*</sup> (g) | m <sub>shell</sub> <sup>*</sup> (g) | m <sub>cap</sub> (Product) (g) | sEF  | EF    | cEF   |
|---------|-----------------------|------------------------|--------------------|-------|--------|---------------------|---------------------|---------------------|----------------------|--------|------------------------------------|-------------------------------------|--------------------------------|------|-------|-------|
| P16     | 12.6                  | 6                      | 17.7               | 58    | 40     | -30                 | 100                 | 0                   | 88                   | 54     | 11.1                               | 9.4                                 | 20.5                           | 0.7  | 0.7   | 5.5   |
| P17     | 12.6                  | 6                      | 4.5                | 58    | 40     | -30                 | 100                 | 0                   | 53                   | 43     | 6.7                                | 8.8                                 | 15.5                           | 0.5  | 0.5   | 7.2   |
| P18     | 23.4                  | 6                      | 24.1               | 58    | 40     | -30                 | 100                 | 0                   | 70                   | 67     | 16.3                               | 8.1                                 | 24.4                           | 1.2  | 1.2   | 5.1   |
| P19     | 2.5                   | 1                      | 63.1               | 42    | 25     | N/A                 | 408                 | 66.8                | 30.5                 | 59.8   | 0.8                                | 0.5                                 | 1.3                            | 51.7 | 104.6 | 383.3 |
| P20     | 3                     | 2                      | 0.6                | 78    | 4      | -50                 | 102                 | 0                   | 43.5                 | 47.5   | 1.3                                | 1.4                                 | 2.7                            | 1    | 1     | 38.9  |
| P21     | 3                     | 2                      | 0.2                | 84    | 4      | -50                 | 100                 | 0                   | 46.5                 | 57.7   | 1.4                                | 1                                   | 2.4                            | 1.2  | 1.2   | 43.3  |

Table 2 : Details for the calculation of the E-factors for the Coacervation process (section 4.1).

## Sustainable Assessment of Atomization: Calculation Details

| Process | m <sub>dr</sub> (g) | m <sub>shell</sub> (g) | m <sub>aq</sub> (g) | m <sub>or</sub> (g) | Yield (%) | E <sub>eff</sub> (%) | T <sub>air</sub> (°C) | sEF | EF    | cEF   |
|---------|---------------------|------------------------|---------------------|---------------------|-----------|----------------------|-----------------------|-----|-------|-------|
| P22     | 0.06                | 0.6                    | 140                 | 47.3                | 35        | 92                   | 100 to 140            | 2.1 | 224.9 | 883.6 |
| P23     | 0.07                | 1.407                  | 1.6                 | 28                  | 37.1      | 100                  | -50                   | 1.7 | 52.8  | 55.7  |

Table 3 : Details for the calculation of the E-factors for the Atomization processes (section 4.2).

# Sustainable Assessment of Microfluidics: Calculation Details

## 1. Comparison between traditional solvent evaporation process and microfluidics

### a. Traditional solvent evaporation

|     | $m_{pol}$<br>(g) | $m_{dr}$<br>(g) | $m_{or}$<br>(g) | $m_r$<br>(g) | $m_{aq}$<br>(g) | $m_p$ (g) | sEF | EF   | cEF  |
|-----|------------------|-----------------|-----------------|--------------|-----------------|-----------|-----|------|------|
| P24 | 0.03             | 0.006           | 3.95            | 0.21         | 70              | 0.03      | 6.9 | 2318 | 2450 |

### b. Microfluidics

|     | Flow rates                     |                                | Dispersed Phase  |                 |              |                 |                 | Continuous Phase |                 |                 | Product   | E-factors |     |       |
|-----|--------------------------------|--------------------------------|------------------|-----------------|--------------|-----------------|-----------------|------------------|-----------------|-----------------|-----------|-----------|-----|-------|
|     | $Q_d$<br>(mL.h <sup>-1</sup> ) | $Q_c$<br>(mL.h <sup>-1</sup> ) | $m_{pol}$<br>(g) | $m_{dr}$<br>(g) | $m_r$<br>(g) | $m_{aq}$<br>(g) | $m_{or}$<br>(g) | $m_r$<br>(g)     | $m_{aq}$<br>(g) | $m_{or}$<br>(g) | $m_p$ (g) | sEF       | EF  | cEF   |
| P25 | 1.02                           | 1.26                           | 0.03             | 0.006           | 0            | 0               | 3.95            | 0.037            | 3.7             | 0               | 0.0335    | 1.2       | 119 | 228.2 |

## 2. Monomer-based processes to produce simple polymer microparticles

|     | Flow rates                     |                                | Dispersed Phase |              |                 |                 | Continuous Phase |                 |                 | Product      |              | E-factors |      |      |
|-----|--------------------------------|--------------------------------|-----------------|--------------|-----------------|-----------------|------------------|-----------------|-----------------|--------------|--------------|-----------|------|------|
|     | $Q_d$<br>(mL.h <sup>-1</sup> ) | $Q_c$<br>(mL.h <sup>-1</sup> ) | $m_m$<br>(g)    | $m_r$<br>(g) | $m_{aq}$<br>(g) | $m_{or}$<br>(g) | $m_r$<br>(g)     | $m_{aq}$<br>(g) | $m_{or}$<br>(g) | Yield<br>(%) | $m_p$<br>(g) | sEF       | EF   | cEF  |
| P26 | 0.08                           | 0.42                           | 0.48            | 0.58         | 0               | 0               | 0.16             | 5.09            | 0               | 100          | 0.48         | 1.6       | 1.6  | 12.2 |
| P27 | 0.1                            | 1.5                            | 0.48            | 0.58         | 0               | 0               | 0.45             | 14.55           | 0               | 100          | 0.48         | 2.2       | 2.2  | 32.7 |
| P28 | 0.035                          | 2.1                            | 1.00            | 0.04         | 0               | 0               | 1.2              | 58.8            | 0               | 97           | 0.97         | 1.3       | 1.3  | 61.7 |
| P29 | 0.0002                         | 0.01                           | 1.01            | 0.04         | 0               | 0               | 1                | 49              | 0               | 100          | 1.01         | 1         | 1    | 49.8 |
| P30 | 0.0002                         | 0.01                           | 1.01            | 0.04         | 0               | 0               | 1                | 49              | 0               | 100          | 1.01         | 1         | 1    | 49.8 |
| P31 | 0.0005                         | 0.004                          | 0.35            | 0.003        | 0               | 0.78            | 0                | 5.62            | 0               | 100          | 0.35         | 0         | 16.0 | 18.2 |

Table 4 : Details for the calculation of the E-factors for the monomer-based microfluidic processes used to produce simple polymer microparticles (section 4.2).

## 3. Monomer-based processes to produce core-shell polymer microparticles

|     | Flow rates                          |                                      |                                | Core              |              | Shell        |              | Continuous Phase |                 |                 | Product      |              | E-factors |     |      |
|-----|-------------------------------------|--------------------------------------|--------------------------------|-------------------|--------------|--------------|--------------|------------------|-----------------|-----------------|--------------|--------------|-----------|-----|------|
|     | $Q_{core}$<br>(mL.h <sup>-1</sup> ) | $Q_{shell}$<br>(mL.h <sup>-1</sup> ) | $Q_c$<br>(mL.h <sup>-1</sup> ) | $m_{core}$<br>(g) | $m_r$<br>(g) | $m_m$<br>(g) | $m_r$<br>(g) | $m_r$<br>(g)     | $m_{aq}$<br>(g) | $m_{or}$<br>(g) | Yield<br>(%) | $m_p$<br>(g) | sEF       | EF  | cEF  |
| P32 | 0.1                                 | 0.9                                  | 16                             | 0.93              | 0            | 8.9          | 0.2          | 3.2              | 156.8           | 0               | 100          | 9.8          | 0.3       | 0.3 | 16.3 |
| P33 | 0.1                                 | 0.9                                  | 16                             | 0.93              | 0            | 8.6          | 0.5          | 3.2              | 156.8           | 0               | 100          | 9.6          | 0.4       | 0.4 | 16.8 |
| P34 | 0.045                               | 0.3                                  | 20                             | 0.91              | 0.019        | 6.7          | 0.3          | 8.9              | 435.6           | 0               | 100          | 7.7          | 1.2       | 1.2 | 58.1 |
| P35 | 0.052                               | 0.11                                 | 8                              | 0.91              | 0.019        | 2.1          | 0.1          | 3.1              | 150.8           | 0               | 100          | 3.1          | 1         | 1   | 50.3 |
| P36 | 0.05                                | 0.16                                 | 12                             | 0.91              | 0.019        | 3.2          | 0.1          | 4.8              | 235.2           | 0               | 100          | 4.2          | 1.2       | 1.2 | 57.8 |
| P37 | 0.054                               | 0.155                                | 9                              | 0.91              | 0.019        | 2.9          | 0.1          | 3.3              | 163.3           | 0               | 100          | 3.8          | 0.9       | 0.9 | 43.6 |
| P38 | 0.052                               | 0.165                                | 10                             | 0.91              | 0.019        | 3.2          | 0.1          | 3.8              | 188.5           | 0               | 100          | 4.1          | 1         | 1   | 46.6 |
| P39 | 1.5                                 | 3                                    | 30                             | 0.98              | 0.020        | 1.8          | 0.2          | 0.4              | 19.6            | 0               | 99           | 2.8          | 0.2       | 0.2 | 7.2  |

Table 5: Details for the calculation of the E-factors for the monomer-based microfluidic processes used to produce core-shell polymer microparticles (section 4.2).

#### 4. Polymer solution-based processes to produce simple polymer microparticles

|     | Flow rates                     |                                | Dispersed Phase  |                 |              |                 |                 | Continuous Phase |                 |                 | Product      |           | E-factors |      |      |
|-----|--------------------------------|--------------------------------|------------------|-----------------|--------------|-----------------|-----------------|------------------|-----------------|-----------------|--------------|-----------|-----------|------|------|
|     | $Q_d$<br>(mL.h <sup>-1</sup> ) | $Q_c$<br>(mL.h <sup>-1</sup> ) | $m_{pol}$<br>(g) | $m_{dr}$<br>(g) | $m_r$<br>(g) | $m_{aq}$<br>(g) | $m_{or}$<br>(g) | $m_r$<br>(g)     | $m_{aq}$<br>(g) | $m_{or}$<br>(g) | Yield<br>(%) | $m_p$ (g) | sEF       | EF   | cEF  |
| P40 | 2                              | 14                             | 0.045            | 0               | 0            | 0               | 0.85            | 1.60             | 6.41            | 0               | 97           | 0.043     | 37        | 56.5 | 204  |
| P41 | 2                              | 14                             | 0.009            | 0               | 0            | 0               | 0.89            | 1.60             | 6.41            | 0               | 97           | 0.009     | 185       | 287  | 1024 |
| P42 | 2                              | 8                              | 0.030            | 0.01            | 0            | 0               | 1.29            | 0.05             | 5.26            | 0               | 100          | 0.04      | 1.33      | 33.6 | 165  |
| P43 | 2                              | 40                             | 0.030            | 0.01            | 0            | 0               | 1.29            | 0.27             | 26.3            | 0               | 100          | 0.04      | 6.6       | 39   | 696  |
| P44 | 0.1                            | 6                              | 0.010            | 0.0001          | 0            | 0               | 1.32            | 0.8              | 80              | 0               | 93           | 0.009     | 85.4      | 226  | 8764 |
| P45 | 0.1                            | 6                              | 0.010            | 0.0001          | 0            | 0               | 1.07            | 0.6              | 60              | 0               | 92           | 0.009     | 64.8      | 180  | 6653 |
| P46 | 0.1                            | 6                              | 0.040            | 0.0004          | 0            | 0               | 1.04            | 0.6              | 60              | 0               | 93           | 0.04      | 16        | 43.7 | 1639 |
| P47 | 0.00008                        | 0.0067                         | 0.020            | 0.002           | 0.0033       | 0.97            | 0               | 1.33             | 0               | 65.07           | 100          | 0.02      | 60.4      | 3018 | 3062 |

Table 6 : Details for the calculation of the E-factors for the polymer solution-based microfluidic processes used to produce simple polymer microparticles (section 4.2).
